# Supplementary material for: Studies in Rats of Combined Muscle and Liver Perfusion and of Muscle Extract Indicate That Contractions Release a Muscle Hormone Directly Enhancing Hepatic Glycogenolysis
Source: MDPI journal article supplement (doi:10.3390/jpm12050837), 2022-05-20
Supplement: s1 [file s1]

**Supplementary Materials:**

Figure S1: Hindquarter and liver combined perfusion.

Figure S2: Hindquarter and liver combined perfusion (close up).

Figure S3: Effect of flow in hindquarter and liver perfused in series.

Figure S4: Plasma glucose response to muscle extract injection in rats.

Table S1: Muscle glycogen concentrations ( $\text{mmol glucose} \cdot \text{kg wet tissue}^{-1}$ ).

Table S2: Perfusate pH and gas tensions.

Table S3: Perfusate concentrations of glucose and lactate.

**Figure S1. Hindquarter and liver combined perfusion**

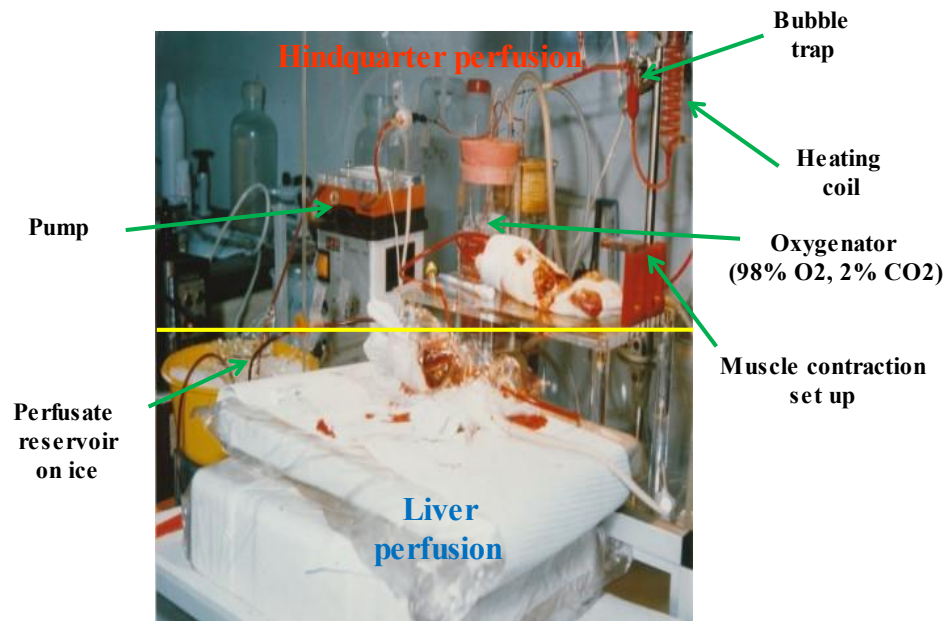

Experimental set up.

**Figure S2. Hindquarter and liver combined perfusion  
(close up)**

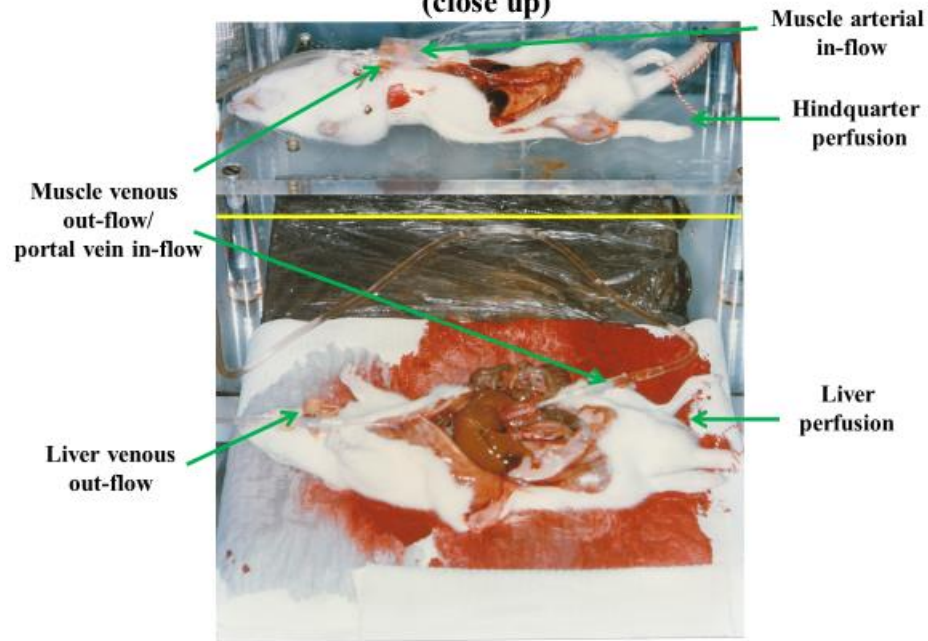

Experimental set up. Only for the close up photo, rats were perfused with cell-free medium. Otherwise, medium for combined muscle and liver perfusions included erythrocytes.

**Figure S3. Effect of flow in hindquarter and liver perfused in series**

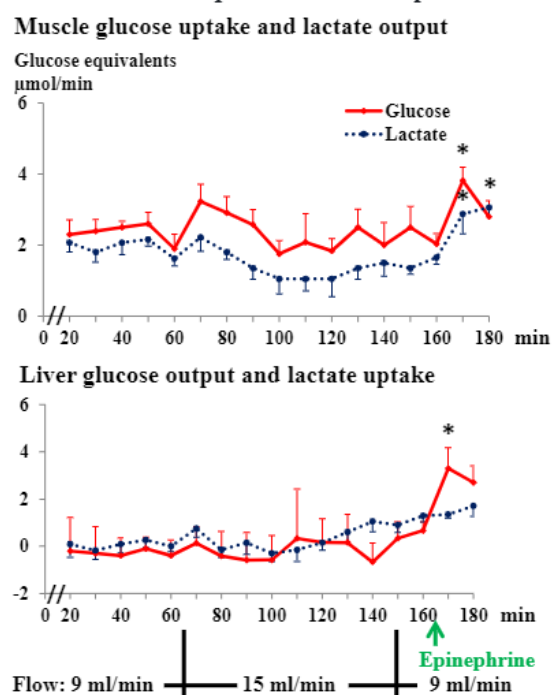

At min 150, flow was reduced to 9 ml/min and 10 min later epinephrine was added to a concentration of 20 nM in cell free perfusate. Values are means  $\pm$  SE in 5 rats. \* significantly different from basal values,  $p < 0.05$ .

**Figure S4. Plasma glucose response to muscle extract injection in rats**

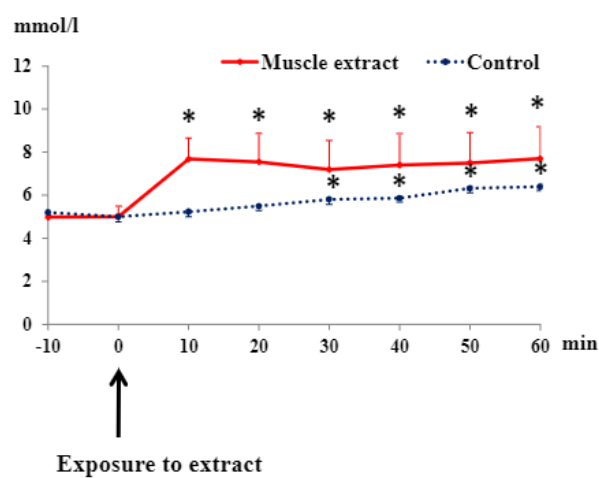

Data are means  $\pm$  SE for groups of 7 rats. \* significantly different from basal

values,  $p < 0.05$ . The data shown for control rats represent responses to intraarterial injection of extract of epididymal fat, but identical responses were seen upon 0.9% NaCl injection.

Table S1. Muscle glycogen concentrations ( $\text{mmol glucose} \cdot \text{kg wet tissue}^{-1}$ ).

|                                  | White gastroc | Red gastroc | Soleus       |
|----------------------------------|---------------|-------------|--------------|
| Rest (5)                         | $37 \pm 3$    | $33 \pm 4$  | $22 \pm 3$   |
| End of 2-legged contractions (7) | $9 \pm 1^*$   | $8 \pm 1^*$ | $17 \pm 1^*$ |

Number of rats shown in parentheses. Values represent average of values from both legs and are means  $\pm$  SE. \* significantly different from values at rest,  $p < 0.05$ .

Table S2. Perfusate pH and gas tensions

|                                   |             |   | pH        | PCO <sub>2</sub> , Torr | PO <sub>2</sub> , Torr | SAT(O <sub>2</sub> ), % |
|-----------------------------------|-------------|---|-----------|-------------------------|------------------------|-------------------------|
| One-legged<br>Contraction<br>(6)  | Basal       | A | 7.40±0.01 | 40±2                    | 438±21                 | 100±0                   |
|                                   |             | V | 7.37±0.01 | 44±2                    | 135±20                 | 97±1                    |
|                                   |             | L | 7.32±0.02 | 52±4                    | 46±7                   | 70±6                    |
|                                   | Contraction | A | 7.32±0.01 | 49±3                    | 420±15                 | 100±0                   |
|                                   |             | V | 7.26±0.01 | 58±3                    | 80±3                   | 93±1                    |
|                                   |             | L | 7.25±0.01 | 61±3                    | 50±4                   | 76±4                    |
| Two-legged<br>Contraction<br>(7)  | Basal       | A | 7.40±0.00 | 38±0                    | 458±13                 | 100±0                   |
|                                   |             | V | 7.35±0.01 | 46±1                    | 79±2                   | 95±0                    |
|                                   |             | L | 7.32±0.01 | 51±1                    | 55±10                  | 78±4                    |
|                                   | Contraction | A | 7.32±0.01 | 46±1                    | 440±13                 | 100±0                   |
|                                   |             | V | 7.24±0.01 | 58±1                    | 75±1                   | 91±1                    |
|                                   |             | L | 7.24±0.01 | 61±2                    | 51±2                   | 78±2                    |
| Flow<br>increase<br>(6)           | Basal       | A | 7.40±0.01 | 40±1                    | 427±22                 | 100±0                   |
|                                   |             | V | 7.34±0.02 | 46±2                    | 107±12                 | 97±1                    |
|                                   |             | L | 7.30±0.02 | 54±2                    | 45±2                   | 75±3                    |
|                                   | High Flow   | A | 7.33±0.02 | 47±2                    | 431±18                 | 100±0                   |
|                                   |             | V | 7.28±0.03 | 54±4                    | 146±13                 | 98±1                    |
|                                   |             | L | 7.26±0.03 | 58±4                    | 59±2                   | 85±2                    |
| Lactic acid<br>Infusion<br>(7)    | Basal       | A | 7.47±0.01 | 35±1                    | 584±21                 | 100±0                   |
|                                   |             | V | 7.41±0.01 | 38±1                    | 73±7                   | 93±2                    |
|                                   | Lactate     | A | 7.40±0.02 | 36±1                    | 581±29                 | 100±0                   |
|                                   |             | V | 7.38±0.02 | 39±0                    | 196±36                 | 98±1                    |
| Muscle Extract<br>Infusion<br>(8) | Basal       | A | 7.48±0.02 | 30±1                    | 556±15                 |                         |
|                                   |             | V | 7.43±0.02 | 34±2                    | 306±13                 |                         |
|                                   | Extract     | A | 7.47±0.01 | 28±1                    | 587±7                  |                         |
|                                   |             | V | 7.39±0.01 | 34±1                    | 229±20                 |                         |

Values are means $\pm$ SE with no. of rats in parentheses. Perfusate pH, Pco<sub>2</sub> and Po<sub>2</sub> and oxygen saturation (SAT) were measured in the basal state as well as 5 min after either start of contractions or increase in perfusate flow in hindquarter-liver perfusions, or after increase in lactic acid concentration in isolated liver perfusion, or after additions of tissue extracts to perfused livers. In hindquarter-liver perfusions, A and V represents, respectively, arterial and venous samples from hindquarters, and L represents sample from liver vein. In the rest of the experiments, A and V represents, respectively, portal and hepatic venous samples.

Table S3. Perfusate concentrations of glucose and lactate

| One-legged |             |           | Two-legged |             |           |
|------------|-------------|-----------|------------|-------------|-----------|
| Time       | Contraction |           | Time       | Contraction |           |
|            | Glucose     | Lactate   |            | Glucose     | Lactate   |
|            | (mM)        | (mM)      |            | (mM)        | (mM)      |
| 40' A      | 6.09±0.13   | 0.88±0.03 | 40' A      | 6.44±0.08   | 1.1±0.08  |
| 40' V      | 5.90±0.12   | 1.17±0.05 | 40' V      | 6.17±0.10   | 1.31±0.09 |
| 40' L      | 5.76±0.14   | 1.30±0.07 | 40' L      | 6.15±0.11   | 1.34±0.09 |
| 70' A      | 5.88±0.13   | 1.25±0.07 | 50' A      | 6.36±0.11   | 1.27±0.09 |
| 70' V      | 5.69±0.11   | 2.35±0.20 | 50' V      | 6.01±0.12   | 2.86±0.16 |
| 70' L      | 5.92±0.13   | 2.20±0.13 | 50' L      | 6.37±0.20   | 2.63±0.13 |
| 80' A      | 5.91±0.13   | 1.70±0.07 | 60' A      | 6.29±0.18   | 2.04±0.18 |
| 80' V      | 5.66±0.11   | 2.32±0.13 | 60' V      | 5.91±0.16   | 2.81±0.16 |
| 80' L      | 5.64±0.15   | 2.08±0.12 | 60' L      | 6.02±0.16   | 2.46±0.16 |
| 90' A      | 5.79±0.12   | 1.87±0.09 | 70' A      | 6.08±0.16   | 2.36±0.18 |
| 90' V      | 5.54±0.11   | 2.23±0.15 | 70' V      | 5.67±0.18   | 2.76±0.20 |
| 90' L      | 5.50±0.13   | 2.08±0.16 | 70' L      | 5.76±0.17   | 2.47±0.19 |
| 110' A     | 5.51±0.12   | 2.00±0.12 | 110' A     | 5.25±0.19   | 2.44±0.24 |
| 110' V     | 5.30±0.13   | 2.18±0.12 | 110' V     | 4.87±0.18   | 2.71±0.22 |
| 110' L     | 5.21±0.14   | 2.03±0.15 | 110' L     | 4.98±0.18   | 2.34±0.25 |

Concentrations of glucose and lactate in perfusate plasma in hindquarter artery (A) and vein (V, also portal vein) and in liver vein (L) during one-legged and two-legged muscle contractions. One-legged contractions were begun after 65 min and lasted 85 min. Two-legged contractions were begun after 45 min and lasted 60 min. Data are means  $\pm$  SE from 6-7 rats in each group.
